# Supplementary material for: Projected Streamflow and Sediment Supply under Changing Climate to the Coast of the Kalu River Basin in Tropical Sri Lanka over the 21st Century
Source: MDPI journal article supplement (doi:10.3390/w13213031), 2021-10-28
Supplement: s1 [file s1]

Archive with 1 entries (1 files):
- water-1396986-supplementary.pdf
