# Supplementary material for: Projected Streamflow and Sediment Supply under Changing Climate to the Coast of the Kalu River Basin in Tropical Sri Lanka over the 21st Century
Source: MDPI journal article supplement (doi:10.3390/w13213031), 2021-10-28
Supplement: s1 [file s1 › water-1396986-supplementary.pdf]

Type of the Paper (Article)

# Projected streamflow and sediment supply under changing climate to the coast of the Kalu River Basin in tropical Sri Lanka over the 21<sup>st</sup> century

T.A.J.G. Sirisena <sup>1,2,\*</sup>, Shreedhar Maskey <sup>1</sup>, Janaka Bamunawala <sup>1,2,3</sup>, Erika Coppola <sup>4</sup>, and Roshanka Ranasinghe <sup>1,2,5</sup>

<sup>1</sup> IHE Delft Institute for Water Education, Delft, The Netherlands

<sup>2</sup> Department of Water Engineering and Management, University of Twente, Enschede, The Netherlands

<sup>3</sup> Department of Civil Engineering, University of Moratuwa, Moratuwa, Sri Lanka

<sup>4</sup> Earth System Physics Section, The Abdus Salam International Centre for Theoretical Physics (ICTP), Trieste, Italy

<sup>5</sup> Harbour, Coastal and Offshore Engineering, Deltares, Delft, The Netherlands

\* Correspondence: j.g.s.thotapitiyaarachchillage@utwente.nl; Tel.: +31617029706

## Supplementary Materials

**Figure S1:** Gridded average annual precipitation, minimum and maximum temperatures respectively from three RCMs over the Kalu River Basin from 1991 to 2005

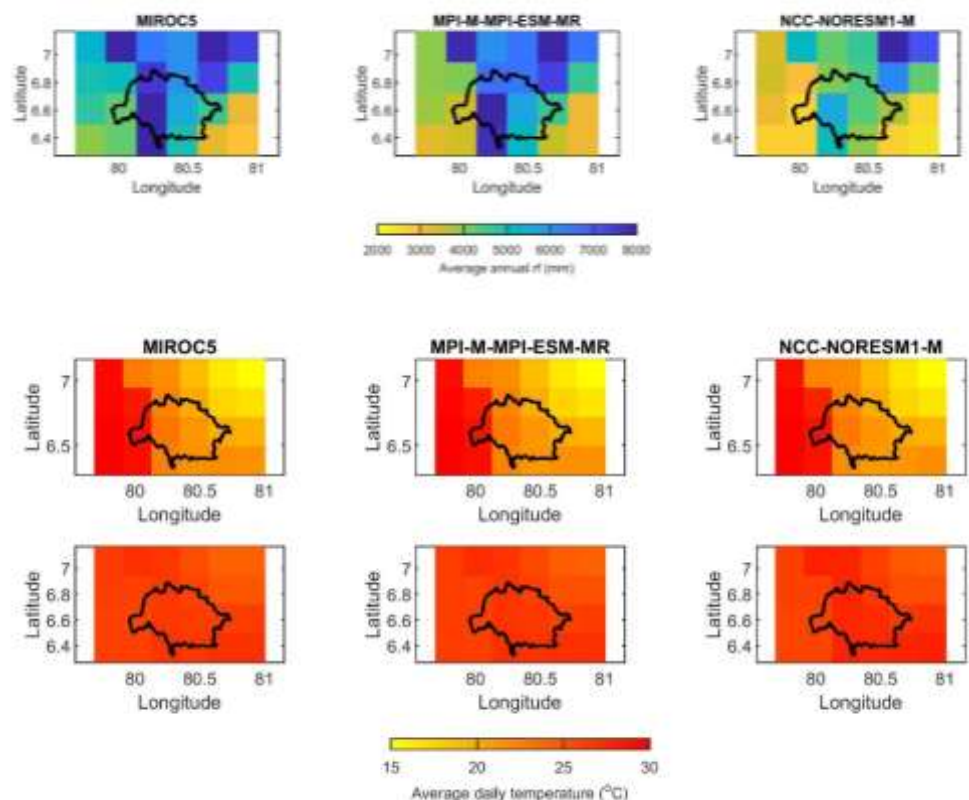

**Citation:** Sirisena, T.A.J.G.; Maskey, S.; Bamunawala, J.; Coppola, E.; Ranasinghe, R. Projected Streamflow and Sediment Supply under Changing Climate to the Coast of the Kalu River Basin in Tropical Sri Lanka over the 21<sup>st</sup> Century. *Water* **2021**, *13*, 3031. <https://doi.org/10.3390/w13213031>

Academic Editor: Peng Gao

Received: 10 September 2021

Accepted: 25 October 2021

Published: 28 October 2021

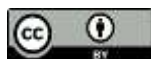

**Copyright:** © 2021 by the authors. Submitted for possible open access publication under the terms and conditions of the Creative Commons Attribution (CC BY) license (<https://creativecommons.org/licenses/by/4.0/>).

Figure S2: Average monthly precipitation from three RCMs over the Kalu River Basin.

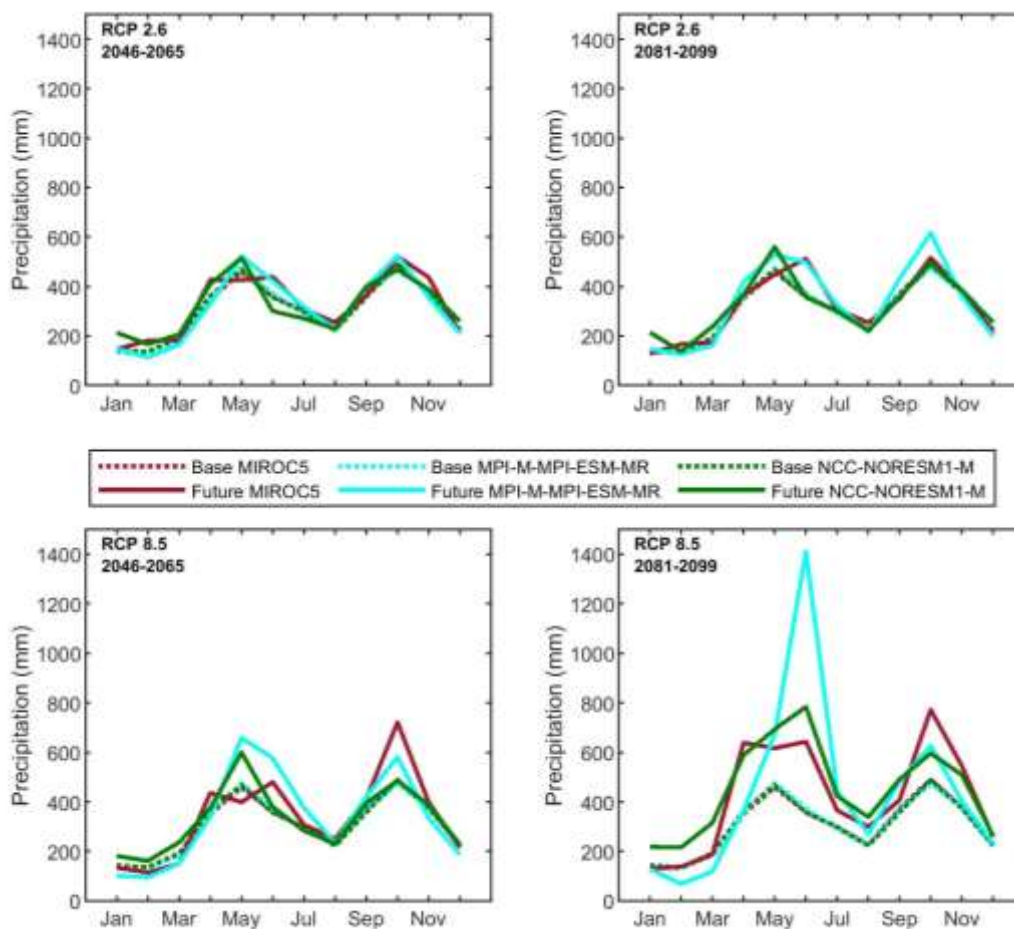

**Table S1:** Hydrological parameters used in model calibration. The prefixes a, v and r in the parameter name denote 'a value is added to the existing value', 'the existing value is replaced by a new one', and 'the existing value is increased or decreased relative to the existing value', respectively during calibration.

| Parameter           | Description                                                                                                             | Scale | Default       | Initial Range  |
|---------------------|-------------------------------------------------------------------------------------------------------------------------|-------|---------------|----------------|
| a__CN2.mgt          | SCS curve number, AMC (II)                                                                                              | HRU   | HRU Specific  | -8 - 10        |
| v__GWQMN.gw         | Threshold groundwater depth for return flow to occur (mm)                                                               | Basin | 1000          | 0 - 1000       |
| v__GW_DELAY.gw      | Groundwater delay time (days)                                                                                           | Basin | 31            | 0 - 150        |
| v__ALPHA_BF.gw      | Baseflow Alpha Factor (days)                                                                                            | Basin | 0.048         | 0 - 1          |
| v__CANMX.hru        | Maximum canopy storage (mm)                                                                                             | Basin | 0             | 0 - 1          |
| v__CH_N2.rte        | Manning's coefficient for the main channel                                                                              | Basin | 0.014         | 0.02 - 0.2     |
| v__CH_K2.rte        | Hydraulic conductivity of the main channel (mm/h)                                                                       | Basin | 0             | 0 - 100        |
| r__SOL_AWC().sol    | Available water capacity of a soil layer (mm H <sub>2</sub> O / mm Soil)                                                | HRU   | Soil specific | -0.5 – 0.5     |
| v__ESCO.hru         | Soil evaporation compensation factor                                                                                    | HRU   | 0.95          | 0 - 1          |
| v__SURLAG.hru       | Surface runoff lag coefficient                                                                                          | HRU   | 2             | 0 - 10         |
| v__EPCO.hru         | Plant uptake compensation factor                                                                                        | HRU   | 1             | 0 - 1          |
| r__OV_N.hru         | Manning's coefficient for overland flow                                                                                 | HRU   | HRU Specific  | 0 – 0.5        |
| v__GW_REVAP.gw      | Groundwater "revap" coefficient                                                                                         | Basin | 0.02          | 0.02 - 0.2     |
| v__REVAPMN.gw       | Threshold water depth in a shallow aquifer for "revap" or percolation to occur (mm)                                     | Basin | 750           | 0 -1000        |
| v__CH_EROD.rte      | Channel erodibility factor                                                                                              | Reach | 0             | 0 – 1          |
| v__CH_COV2.rte      | Channel cover factor                                                                                                    | Reach | 0             | 0 – 1          |
| v__SPCON.rte        | Liner parameter for calculating the maximum amount of sediment that can be re-entrained during channel sediment routing | Reach | 0.0001        | 0.0001 - 0.002 |
| v__USLE_P.mgt       | USLE support practice factor                                                                                            | HRU   | HRU           | 0 - 1          |
| v__USLE_C.plant.dat | USLE cover factor                                                                                                       | plant | plant         | 0.001 – 0.3    |
